# Supplementary material
Source: Springer Nature journal article supplement (https://www.springermedizin.de/resource/supplementary/12937_2010_297_MOESM1_ESM.pdf/25654812)

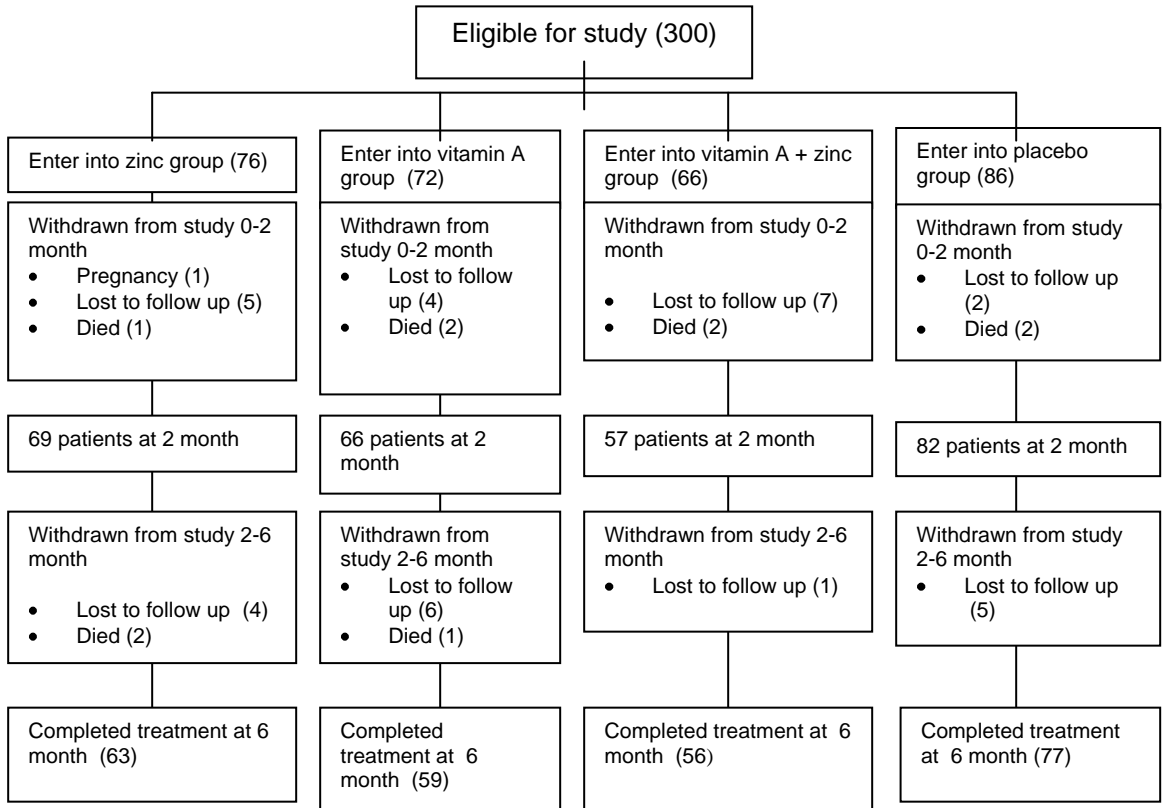

Supplement: MOESM1 [file 25654812]
